# Supplementary material for: On-chip ultrasonic sample preparation for cell based assays
Source: Royal Society of Chemistry journal article supplement (doi:10.1039/c5ra16865a), 2015-01-01
Supplement: c5ra16865a2.pdf [file c5ra16865a2.pdf]

Supplementary video S1: Real-time video showing continuous injection, trapping and up-concentration of isolated A549 cancer cells in Zone 3 (cf. Fig. 1). The flow rate is 0.5  $\mu\text{l}/\text{min}$  and the size of the chamber is 3.63 $\times$ 1.43 mm. A still image of the same experiment is shown in Fig. 6b.
